# Supplementary material
Source: PubMed Central journal article supplement (PMC3044961)

## Supplemental data

**SUPPLEMENTAL FIGURE S1. Interaction of TBK1 with TAPE.** 293T cells were transfected with mTBK1 together with pEGFP-N1, hTAPE-EGFP or its deletion mutants. Expression of hTAPE and its deletion mutants were examined by western blot (*left panel*). Interaction of mTBK1 with hTAPE and its deletion mutants was examined by the IP-WB analysis (*right panel*).

**SUPPLEMENTAL FIGURE S2. TAPE is critical for TLR3-mediated RANTES production.** 293 cells treated with indicated siRNAs were transfected with TLR3, and then stimulated with poly(I:C) (50 $\mu$ g/ml). Supernatants were measured by ELISA for RANTES production. Values represent the mean  $\pm$  SEM of triplicate samples.

### SUPPLEMENTAL FIGURE S1

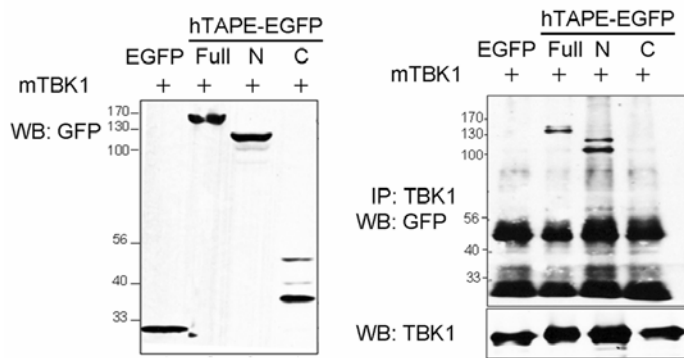

### SUPPLEMENTAL FIGURE S2

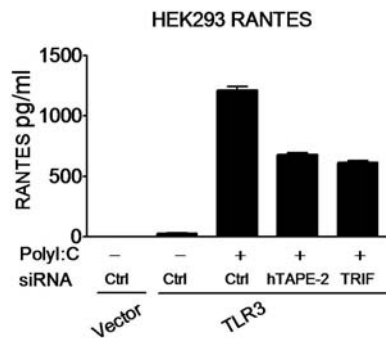

Supplement: supp_M110.164632_jbc.M110.164632-1.pdf [file supp_M110.164632_jbc.M110.164632-1.pdf]
